# Supplementary material for: Multiple Instances of Adaptive Evolution in Aquaporins of Amphibious Fishes
Source: MDPI journal article supplement (doi:10.3390/biology12060846), 2023-06-12
Supplement: s1 [file s1]

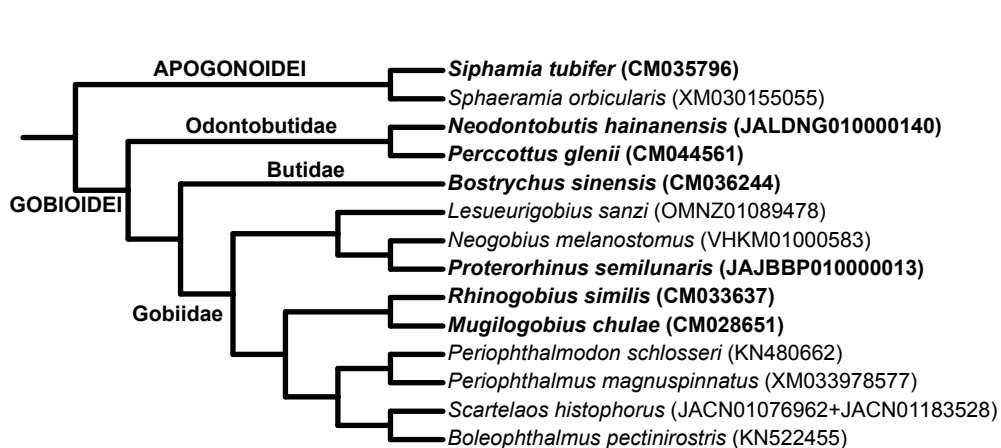

# NPA motif

|   |   |   |   |   |   |   |   |   |
|---|---|---|---|---|---|---|---|---|
| A | S | C | N | P | C | G | A | L |
| A | S | C | N | P | C | G | V | L |
| A | S | C | S | I | I | S | P | L |
| A | S | C | S | I | I | L | P | L |
| A | S | C | S | F | I | W | P | L |
| A | S | C | S | P | I | V | P | L |
| A | S | C | S | L | I | G | P | L |
| A | S | C | S | P | I | G | P | L |
| A | S | C | S | F | I | S | P | L |
| A | S | C | S | F | I | W | P | L |
| A | S | C | S | F | I | W | P | L |
| A | S | C | S | F | I | W | P | L |
| A | S | C | S | F | I | G | P | L |
| A | S | C | S | F | I | G | P | L |
