# Supplementary material for: Multiple Instances of Adaptive Evolution in Aquaporins of Amphibious Fishes
Source: MDPI journal article supplement (doi:10.3390/biology12060846), 2023-06-12
Supplement: s1 [file s1]

**Table S2.** Results of the recombination analyses performed with the GARD software.

| <b>Aquaporin</b> | <b>Recombination</b>   |
|------------------|------------------------|
| 0                | No recombination found |
| 1                | No recombination found |
| 3                | No recombination found |
| 4                | No recombination found |
| 7                | No recombination found |
| 8                | No recombination found |
| 9                | No recombination found |
| 10               | No recombination found |
| 11               | No recombination found |
| 12               | Recombination found    |
| 14               | No recombination found |
| 15               | Recombination found    |
