# Supplementary figures and images for: Multiple Instances of Adaptive Evolution in Aquaporins of Amphibious Fishes
Source: MDPI journal article supplement (doi:10.3390/biology12060846), 2023-06-12

A

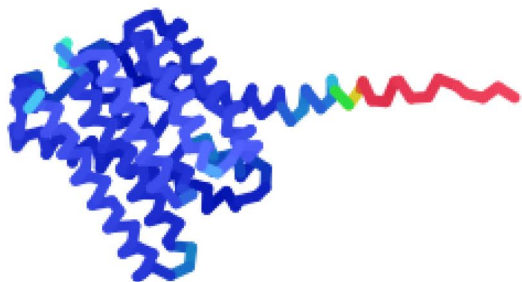

B

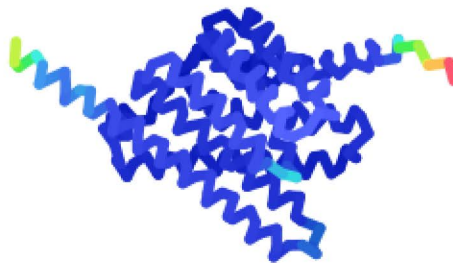

C

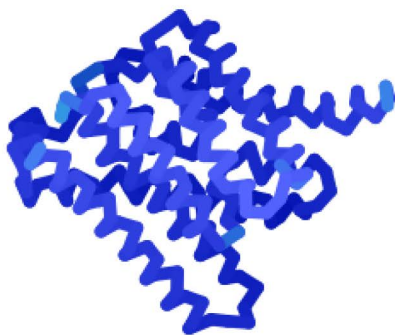

D

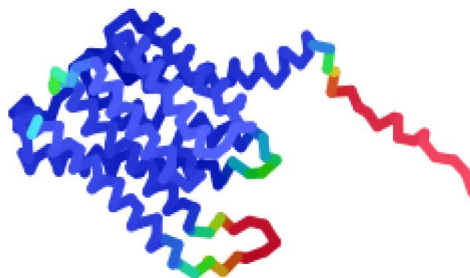

E

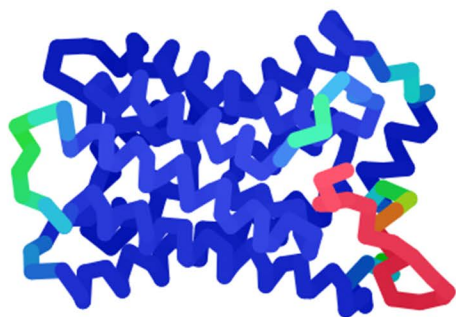

F

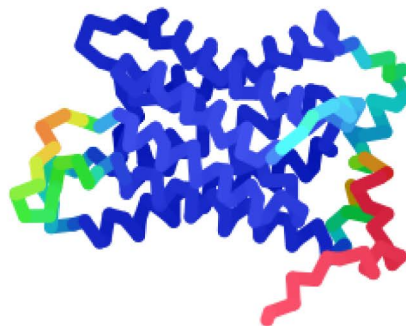

pLDDT: ■ Very low (<50) ■ Low (60) ■ OK (70) ■ Confident (80) ■ Very high (>90)

Supplement: s1 [file s1]

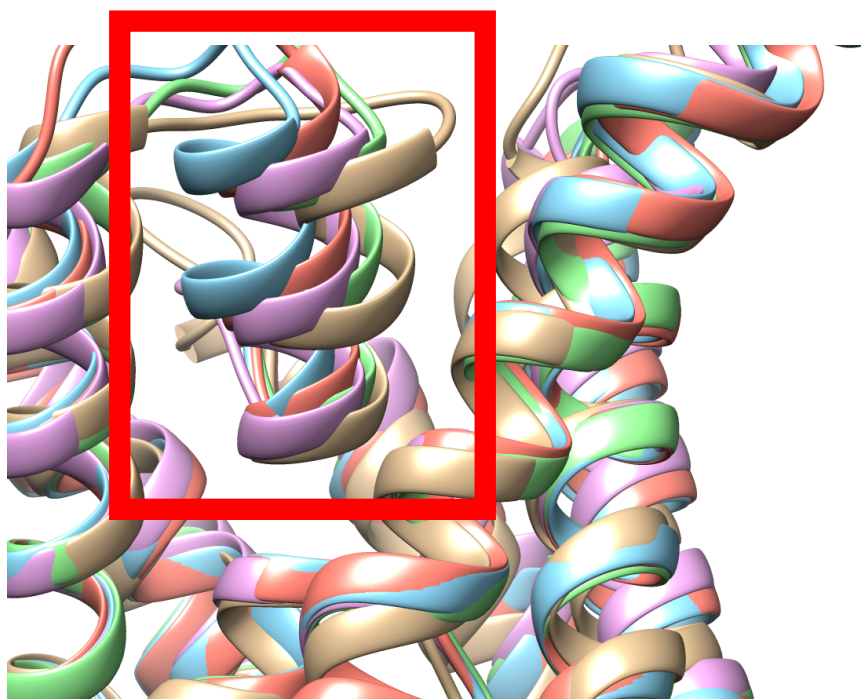

Supplement: s1 [file s1]

A

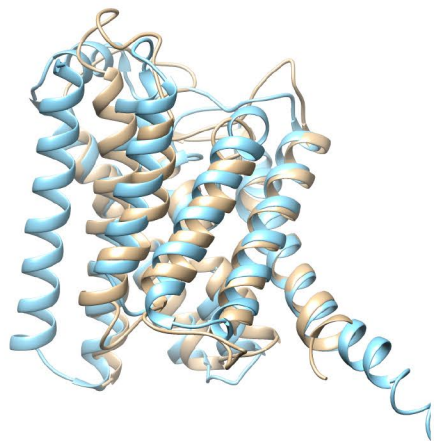

B

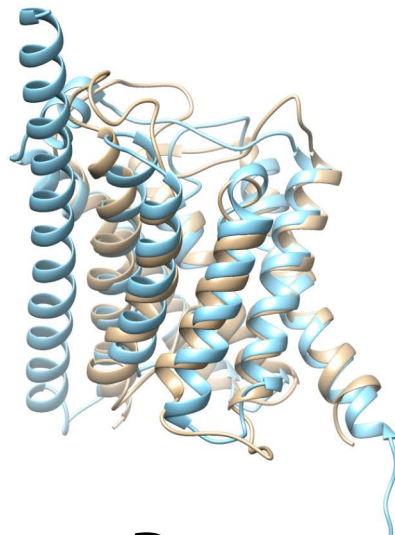

C

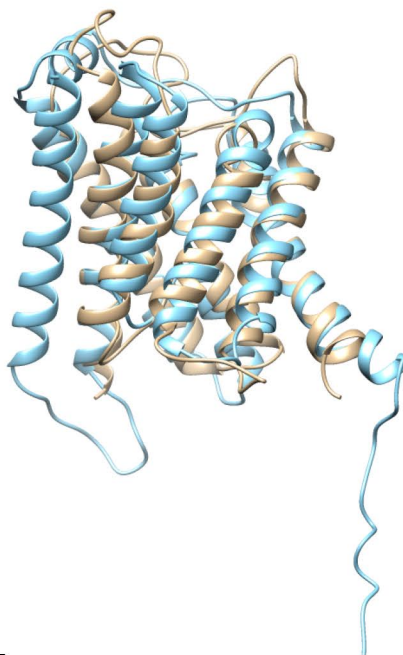

D

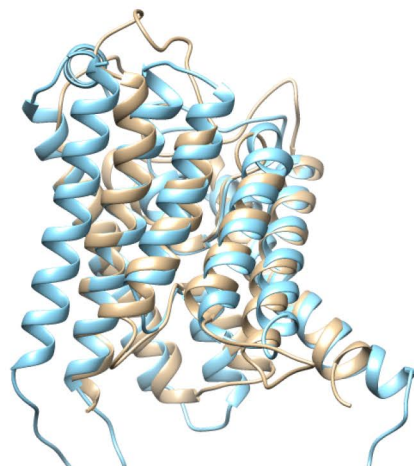

E

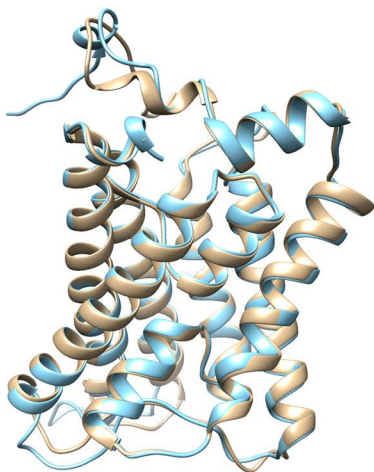

F

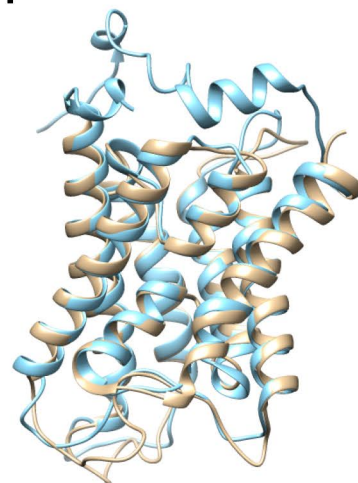

Supplement: s1 [file s1]

# Duplication events

★ WGD

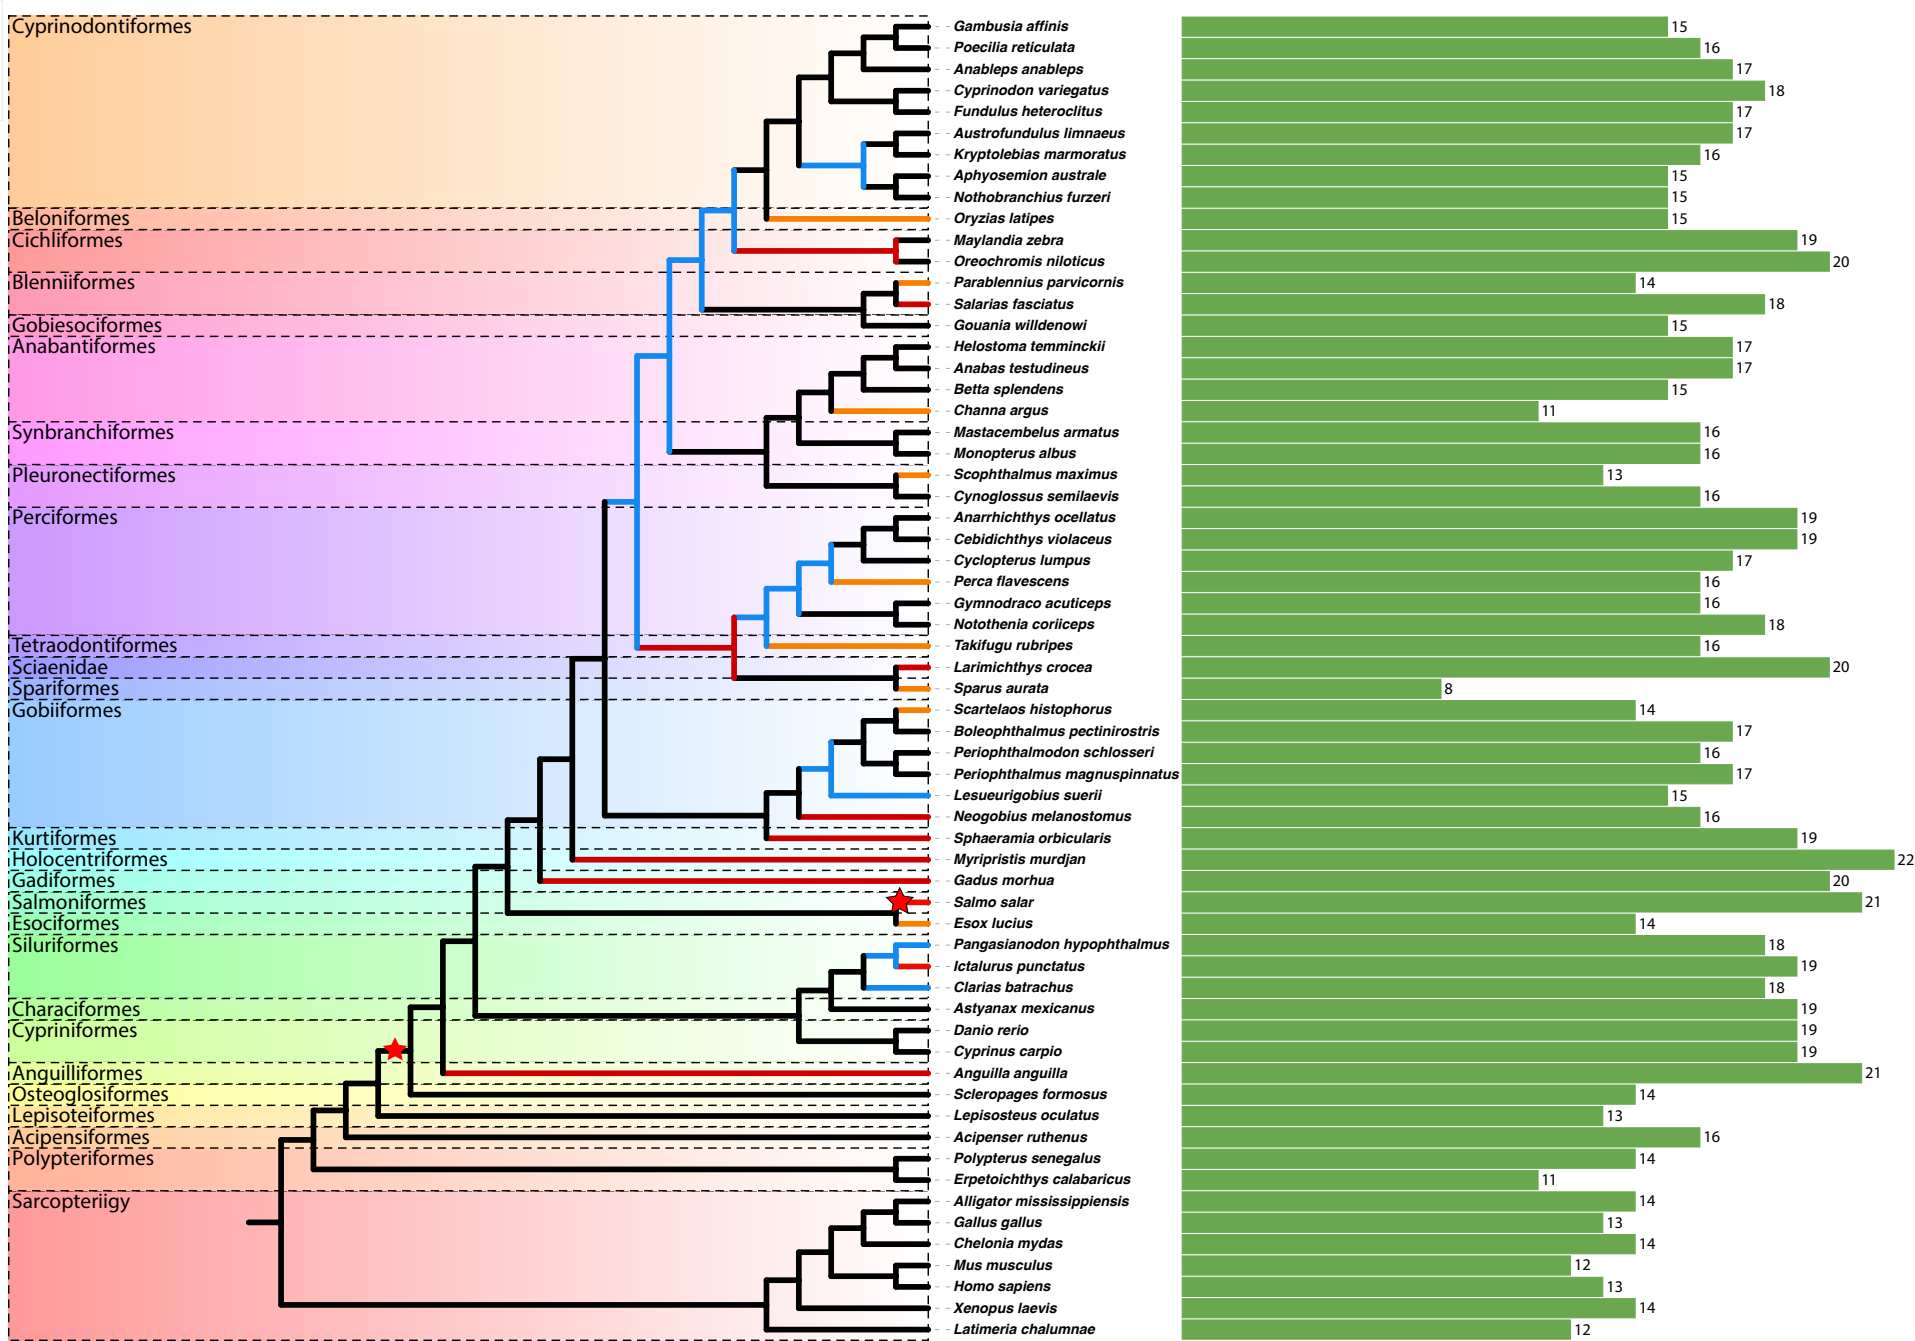

Supplement: s1 [file s1]

**A**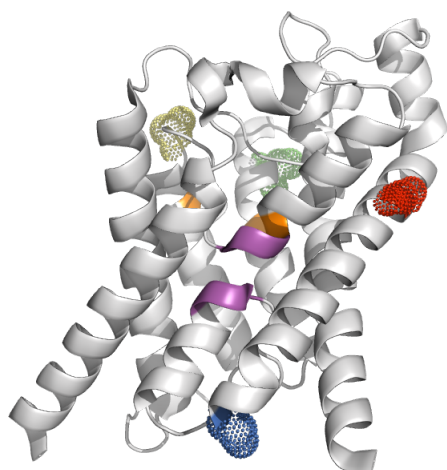**B**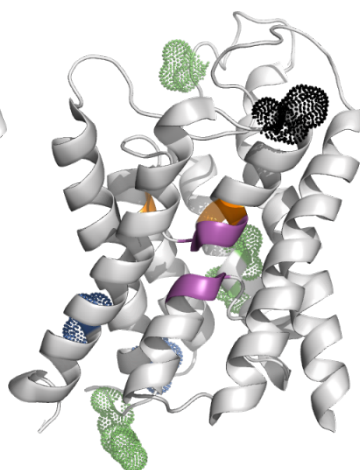**C**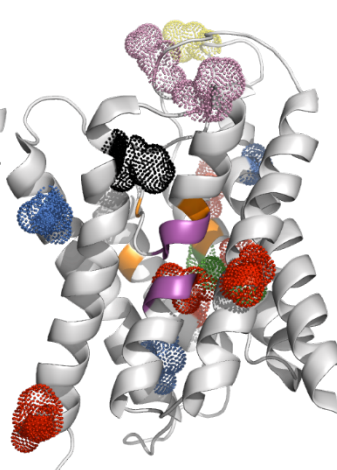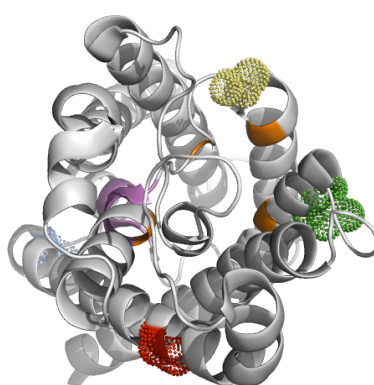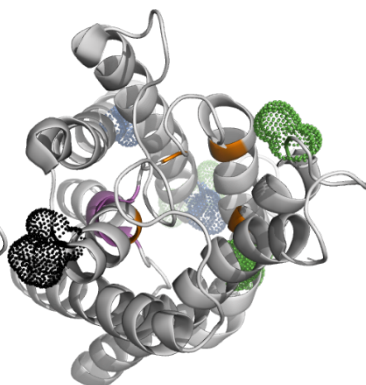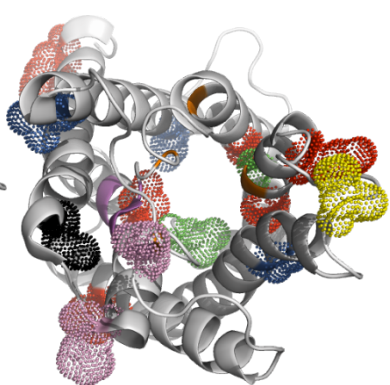

Supplement: s1 [file s1]
